# Supplementary material for: Efficient transfection of Atlantic salmon primary hepatocyte cells for functional assays and gene editing
Source: bioRxiv or medRxiv preprint supplement (doi:10.1101/2022.10.20.513028), 2022-11-14
Supplement: Supplementary file [file media-1.pdf]

**Supplemental data 1:** The Atlantic salmon *elov15b* promoter region (NC\_027327.1: 27244001 – 27245560) cloned into pGL4.10-*elov15b*WT.

5'GAGAATGAGGTTAAGGTTAGCAAAAGAGTTAGGGTTAGGCCAAACTAAAAAGCTAAGG  
 TTGTCAACAACCTTTATCCCCGACGCGACAACCTAGATGGCGGTGTACTAGTATCCACAAC  
 CGCACAGACTATCCCTAAAAAATGCACCAGTATCATAACACAGGTTACTGAGCTCTGCTC  
 TGTGTAGCCATGTGAGTGATGCAGTGATTTGATTGGTCTCCACTGACGAGAAATGAATGG  
 GGTGACATCGGCTTGCTAACTGATTTATTAAGTGGTTGTGAGTGATGCAGTGATTTGATTG  
 GTCTCCACTGATGCGAAATGAATGGGGTGACATCGGCTTGCTTACCGACTTGCTATCTGG  
 GACGCATTCAGCAGTGTTGAAGGTTTTGGAACGTTTCAGATAGAAATATGCTAAAATATAG  
 CTCAAACATGCCTCTCTGGCATATATAAGGAATCACATCGGCTCTAGTCATGGTATTTCTA  
 TCTGCAACGTTTCGAGAACGTTTGGCAACTGAACATGGCCTAGGTTGCAGTTATACACGTA  
 CCGCGTTCAACCAGTTAGTATGTCGGAAATTCCTGTAACGCAGCATTGGGCACGTTTTTC  
 TTGTCACTTTCTCTAAATCCAGCATGTCACCTATACTATAAGGCTACGAATAAAACCTCACG  
 AGTAACCTTGTCCCGACTACAACGCACATCCCGGGTGTCTGTAGCCCAGGCAAAATGTAA  
 GAGTGCACAAATATTATTAAGCACATTGGCTAAAAGAGAATAGCTCTTTGGTATACGTAA  
 ATGCGCAGTTGTGCATTTAAACGTGCCTCTACAACCTAAGATTTTCACTACTCAGCAAAC  
 CATGCAGTTTATTAGGCTACAGATTAATAATGCTAAACTTTACAGGGTGGAGACACTGC  
 ACGGTGATGAGTTTGTGCTCATTTCCTAATACATGATGATCAATGCTTGACCGCTCCATAA  
 TAATCTCATCATGTAGCTACCCGCACAGCCTACAAGCACTGTAGCTGTTGGCTAGAGCGC  
 ACATGACAAGACCAGAGTAGACTGGCACATTTGCTATTTAATGCAAGAGATTTTGTGACA  
 AAACAATCGGTAGAGTTGAAAATGCTATAAACACATTGAATTTAAGAGGAACGGTACAT  
 GTTGTGTGCACTATGTCATCACGCACTGATTTTTATTTGCAACAAGTCGGTTTGGTGGAAA  
 AACAATTGGTAGGAAAATGCCCATATTTCTTTATGCCGGTTTTAAATATTCACATGAAA  
 ATCTGTGCCAATTGAATGGAAACCTAGTTTAAGTGGGACGCCAACATCAGCAGACGGTC  
 AAATCACCTTCTGGGTGATGATCACTGCCAATGAGGTAGGCCATTAGGGAGGCTGATAGC  
 CAATTATCTACCATCTGAAGATGATAGCCTAATAGCTAGATCTCGTCACTTATGACGCTCT  
 GGACAATTTGCCATATAGACTGAGTTCATGTGTTTCTCCCGCTGTTTCCACTGACCGACGA  
 GGCTGCACATTTGTGCTTTGGGACCTGGGCAGGCAAGATTACGCATCCTCCAGAG3'

**Supplemental table 1:** Primers used for cloning pGL4.10-*elov15b*WT.

| Primer name  | Sequence (5'-3')                                |
|--------------|-------------------------------------------------|
| E15bWTPromFw | <u>ACTGGCCGGTACCTGG</u> GAGAATGAGGTTAAGGTTAGCAA |
| E15bWTPromRv | <u>CCGGATTGCCAAGCTCTCT</u> GGAGGATGCGTAATCTTGC  |

\*Underlined primer sequences are 15 bp homology arms required for InFusion HD cloning.

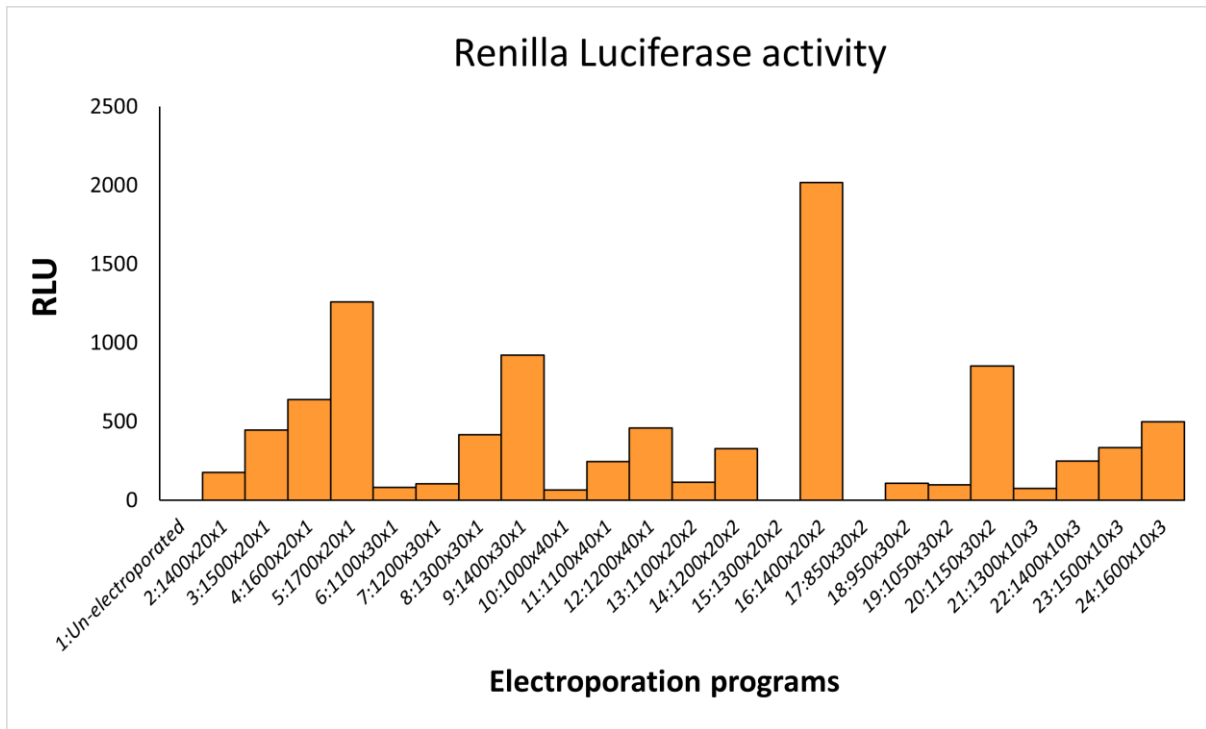

**Supplemental figure 1:** Renilla luciferase activity in cells electroporated with 24 different electroporation programs. The Renilla signal is measured in relative light units (RLU). Background signal from un-transfected sample (program 1) is subtracted.
